# Supplementary material for: Reduced Chlorhexidine and Daptomycin Susceptibility in Vancomycin-Resistant Enterococcus faecium after Serial Chlorhexidine Exposure
Source: PubMed Central journal article supplement (PMC5740357; doi:10.1128/aac.01235-17), 2017-12-21
Supplement: AAC.01235-17_zac001186763s1.pdf [file AAC.01235-17_zac001186763s1.pdf]

1 **Supplemental Figures and Tables**

2

3 **Figure S1. CHX induces *liaX* gene expression in *E. faecium*.** RT-qPCR was used to quantify  
4 the expression of *liaX* upon exposure to CHX for 15 min as compared to control untreated  
5 condition. Expression of *liaX* was internally normalized to *clpX*, and expression in control  
6 cultures was set to 1 (not shown). The fold change in *liaX* expression in cultures treated with 1X  
7 MIC CHX relative to the control was quantified for two independent (Trial 1 and 2) experiments.  
8 Efm 410, *E. faecium* 1,231,410; Efm 733, *E. faecium* 1,141,733.

9

10 **Figure S2. Quantification of genes expression levels in DAP mutants by RT-qPCR.** RT-  
11 qPCR was used to quantify the expression of **A) *liaX*, B) *chtR* and *chtS*, and C) *cls-1* and *cls-2***  
12 **genes at exponential phase (OD<sub>600</sub>~0.6) in DAP mutants compared to *E. faecium* 410.**  
13 **Expression of genes of interest was internally normalized to *clpX*, and expression in *E. faecium***  
14 **410 cultures was set to 1. The standard deviation was calculated from n=3 independent**  
15 **experiments and one-tailed Student's *t*-test was used to calculate significance value. \*, *P* <**  
16 **0.05. 410 wild-type, *E. faecium* 1,231,410.**

17

18 **Figure S3. Quantification of expression levels of cytidylate kinase (*cmk*) in DAP mutants.**  
19 **A) Gel electrophoresis analysis of *cmk* promoter amplicons in *E. faecium* 410 wild-type and**  
20 **DAP-A mutants. 100 ng of purified PCR products were analyzed for each on a 1% TAE gel.**  
21 **Presence of wild-type and IS1251 insertion PCR bands in the *cmk* promoter were observed in**  
22 **the DAP-A mutants. B) RT-qPCR confirmed significant down-regulation of *cmk* transcript levels**  
23 **in the DAP mutants vs. *E. faecium* 410 during exponential growth (OD<sub>600</sub>~0.6) in three**  
24 **independent trials. Expression of *cmk* was internally normalized to *clpX* and expression of *E.***  
25 ***faecium* 410 was set to 1 (not shown). \*, *P* < 0.05. 410 wt, *E. faecium* 1,231,410; Neg., negative**  
26 **control.**

27

28 **Figure S4. Quantification of intracellular organic phosphate (Pi) levels in *E. faecium* 410**  
29 **wild-type and DAP-B1 mutant.** Intracellular Pi levels were measured for wild-type and DAP  
30 strain DAP-B1 at different growth time points (OD<sub>600</sub> 0.4-0.8) as described in materials and  
31 methods. The levels (pmoles) were normalized using CFU count. Standard deviation was  
32 calculated from n=3 independent experiments and significance value was calculated using one-  
33 tailed Student's *t* test. Time points: 1, OD<sub>600</sub> 0.4-0.5; 2, OD<sub>600</sub> 0.5-0.6; 3, OD<sub>600</sub> 0.6-0.7 and 4,  
34 OD<sub>600</sub> 0.7-0.8. \*, *P* < 0.05. 410 wt, *E. faecium* 1,231,410.

35

36 **Figure S5. Cardiolipin levels are decreased in DAP-A1 and DAP-A2 mutants.** Lipidomic  
37 analysis of *E. faecium* 410 and DAP strains DAP-A1 and -A2 was performed by normal-phase  
38 LC-ESI/MS in the negative ion mode. The major lipids detected are phosphatidylglycerol (PG),  
39 cardiolipin (CL), diacylglycerol (DAG), monohexosyldiacylglycerol (MHDAG),  
40 dihexosyldiacylglycerol (DHDAG), phosphatidic acid (PA), and lysylphosphatidylglycerol (LPG).  
41 Shown are the total ion chromatograms (TIC) and the selected mass spectra of [M-H]<sup>-</sup> ion  
42 species of PG and CL from the first trial.

43

44 **Figure S6. Lipid-like compounds (Atmer-163) are detected in *E. faecium* 410 but not in**  
45 ***ΔefrEF* mutant. A)** Positive ion ESI mass spectra showing the detection of Atmer-163 (C<sub>13</sub>)  
46 ([M+H]<sup>+</sup> at *m/z* 288) and Atmer-163 (C<sub>15</sub>) ([M+H]<sup>+</sup> ion at *m/z* 316) in *E. faecium* 410, and their  
47 absence in the *ΔefrEF* mutant. **B)** Chemical structures and molecular formulae of Atmer-163  
48 (C<sub>13</sub>) and Atmer-163 (C<sub>15</sub>). **C)** MS/MS spectrum of Atmer-163 (C<sub>15</sub>) [M+H]<sup>+</sup> ion at *m/z* 316. The  
49 fragment ion structures are depicted.

50

51 **Table S1.** List of primers used in the study.

52

53 **Table S2.** Doubling time and rifampin mutation frequency for the DAP strains vs. *E. faecium* 410

54 wild-type.

55

Figure S1

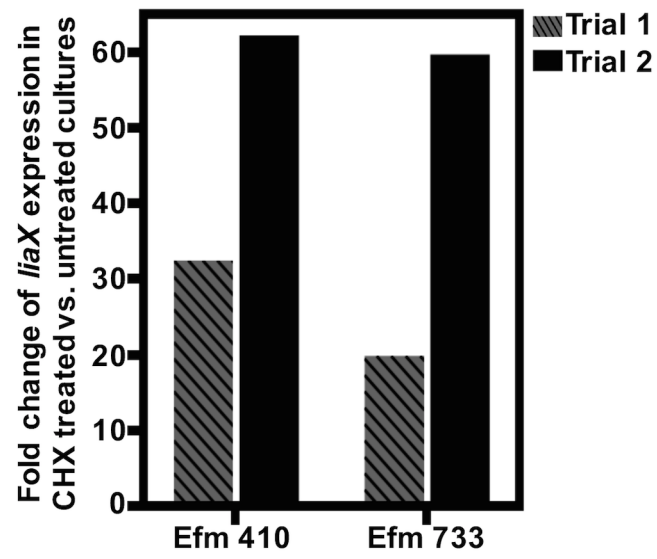

Figure S2

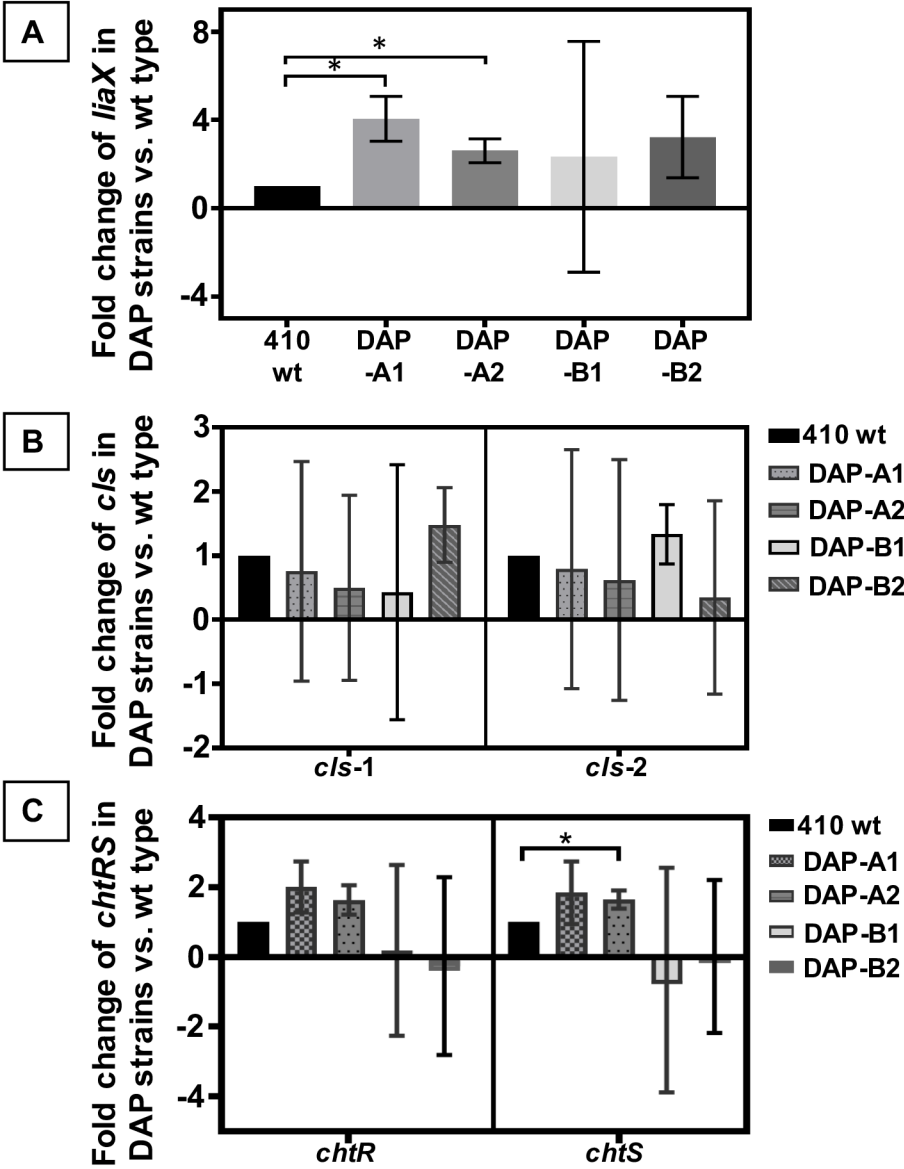

Figure S3

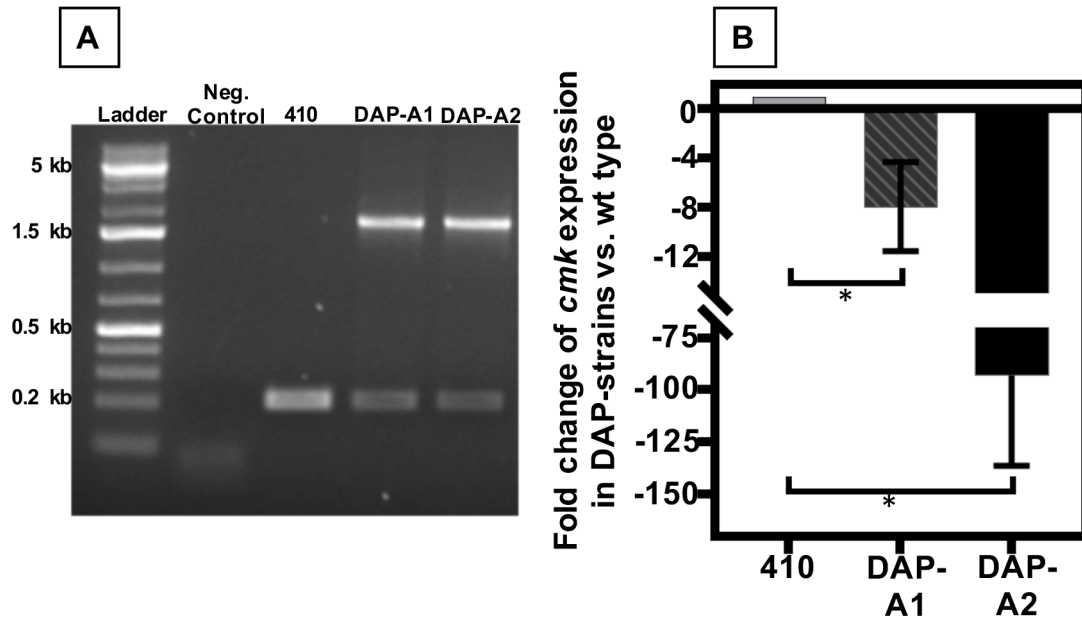

Figure S4

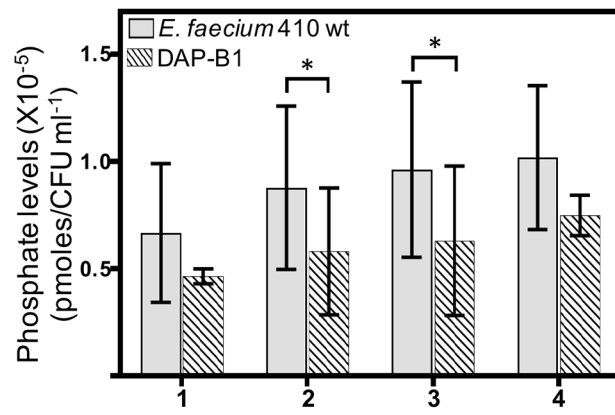

Figure S5

**A) *E. faecium* 410**

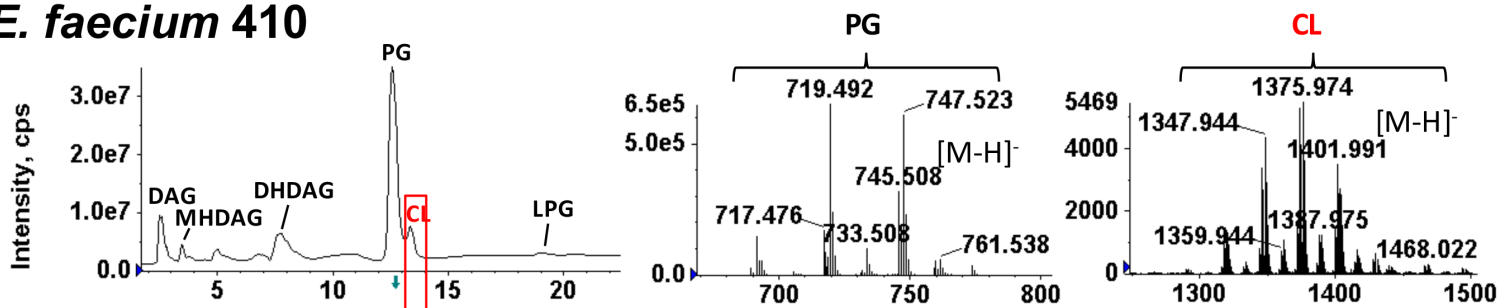

**B) DAP-A1**

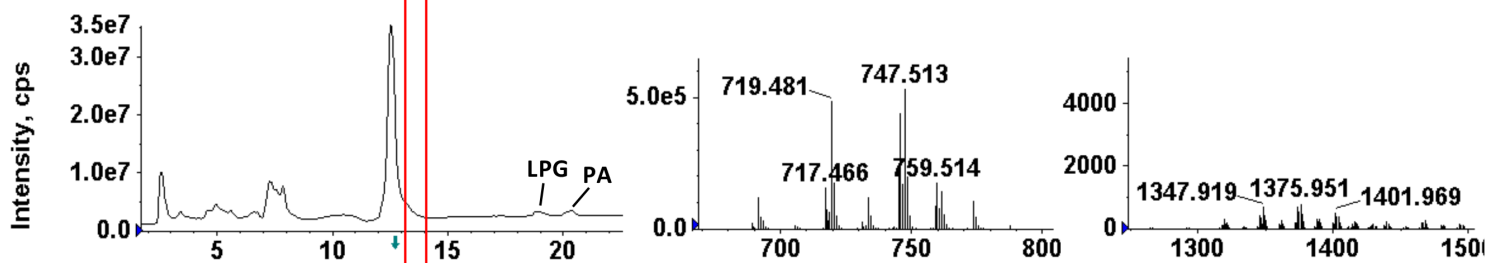

**C) DAP-A2**

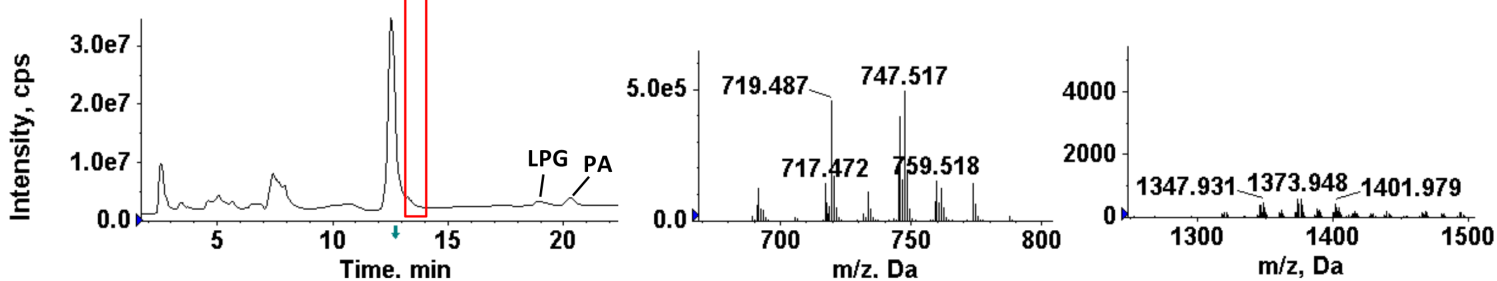



Figure S6

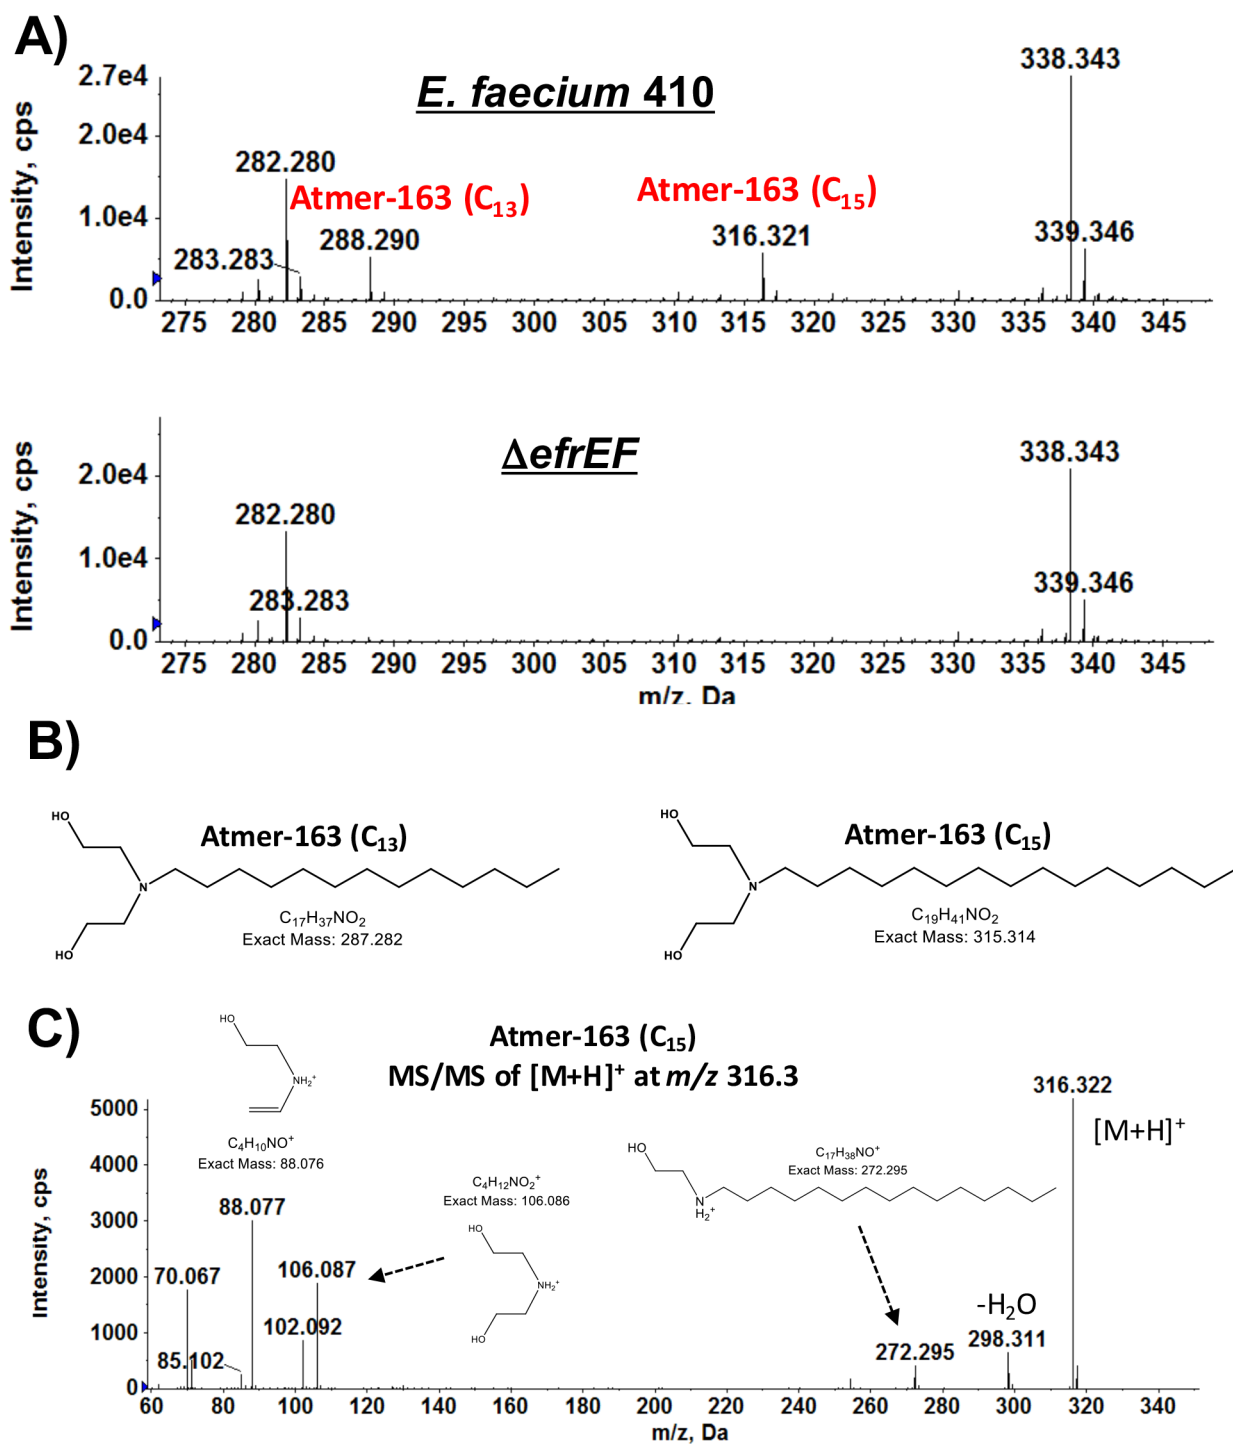

**Table S1. List of primers used in the study.**

|                                            |                                            |
|--------------------------------------------|--------------------------------------------|
| <b><u>1.Real time primers</u></b>          |                                            |
| 410 <i>clpX</i> for                        | GCAAAACGCTCGTTAGCTGT                       |
| 410 <i>clpX</i> rev                        | CCAGACCCTGTAGGTCCGAT                       |
| 410 <i>liaX</i> for                        | CCCAGCATTTCGCAACGA                         |
| 410 <i>liaX</i> rev                        | TGCATGGCAAGTCAGGTGAA                       |
| 733 <i>clpX</i> for                        | AAACGCTCGTTAGCTGTTGC                       |
| 733 <i>clpX</i> rev                        | CCCTGTAGGTCCGATCAAGC                       |
| 733 <i>liaX</i> for                        | GCAGCAAACGGAAACGTGAC                       |
| 733 <i>liaX</i> rev                        | CTCGATCTGGCTCCGTTCAAG                      |
| 410 <i>cmk</i> for                         | GGCTCATCCTTCGGTGTGAA                       |
| 410 <i>cmk</i> rev                         | GCACTGTTTCCCAATACCGC                       |
| 410 <i>cls1</i> for                        | CCTGGGGTGGGCTTTGTATT                       |
| 410 <i>cls1</i> rev                        | TATCGCCCATGTCAGGATCG                       |
| 410 <i>cls2</i> for                        | CAAATCGTGACAAGCGGACC                       |
| 410 <i>cls2</i> rev                        | AGAGCCAACTTCAGTGCTTCA                      |
| 410 <i>chtS</i> for                        | TCGCTACGAGATCGTTGGTG                       |
| 410 <i>chtS</i> rev                        | GTTTCCGTGATCCGGCGTA                        |
| 410 <i>chtR</i> for                        | GCTATGAACATGGGGGCAGA                       |
| 410 <i>chtR</i> rev                        | ACGTAATGCCATTGTGGCTC                       |
| <br>                                       |                                            |
| <b><u>3. ABC transporter</u></b>           |                                            |
| ABC transporter flankingarm1_for           | ATGCAT <b>GAATTC</b> CCTCTAAAAAACTAAAATTCT |
| ABC transporter flankingarm1_rev           | ATGCAT <b>GCATGC</b> GATAGACATATTATTCCTCCT |
| ABC transporter flanking arm2_for          | ATGCAT <b>GCATGC</b> ATAGCGTAACAAACATTATCT |
| ABC transporter flanking arm2_rev          | ATGCAT <b>GGATCC</b> TGGACAACACATATGATATTT |
| ABC complementation for                    | ATGC <b>GGATCC</b> GCGGATCGTTGATTTTGGCA    |
| ABC complementation rev                    | ATGC <b>GGATCC</b> CCTGCCTCTTCCGTTCAACT    |
| <br>                                       |                                            |
| <b><u>4. Confirmation of mutations</u></b> |                                            |
| ABC transporter for                        | GCTTGGGTCACTCCAATTGC                       |
| ABC transporter rev                        | CCGTCGTAATGAGGCAAACG                       |
| RelA for                                   | GTGACAAAAGAAGAAATTTTAACG                   |
| RelA rev                                   | CTATCCATTCGTCCGGCGTACACT                   |
| Hydrolase for                              | TGGGATGGCTAGATCGGCTA                       |
| Hydrolase rev                              | CGCTGCTTCTGTAGGGACAA                       |
| <i>cmk</i> for                             | TGGCAACGGTACTTTTCCA                        |
| <i>cmk</i> rev                             | GTGCAGGGATCACCCTGAT                        |
| PhoU for                                   | ATGGGGATGATGGTGAGCAG                       |
| PhoU rev                                   | CTGCCCTTTTACGCGAATCG                       |
| Glycosyl transferase for                   | CCAAGTATCCCTGCTCCGAA                       |
| Glycosyl transferase rev                   | AAGGTGCGTATTCAGGTGCA                       |

**Table S2. Doubling time and Rifampin mutation frequency for the DAP strains vs. *E. faecium* 410 wild-type.**

| <b>Strains</b>                  | <b>Average doubling time<br/>± SD (mins)<sup>a</sup></b> | <b><i>P</i> value<sup>b</sup></b> | <b>Average Rifampin mutation<br/>frequency ± SD (X 10<sup>-7</sup>)<sup>a</sup></b> | <b><i>P</i> value</b> |
|---------------------------------|----------------------------------------------------------|-----------------------------------|-------------------------------------------------------------------------------------|-----------------------|
| <b><i>E. faecium</i> 410 wt</b> | 29.27 ± 1.63                                             |                                   | 1.68 ± 1.75                                                                         |                       |
| <b>DAP-A1</b>                   | 37.82 ± 5.26                                             | *0.028                            | 3.16 ± 3.53                                                                         | 0.13                  |
| <b>DAP-A2</b>                   | 42.67 ± 2.78                                             | *0.013                            | 3.23 ± 4.66                                                                         | 0.18                  |
| <b>DAP-B1</b>                   | 38.48 ± 2.09                                             | *0.014                            | 0.615 ± 0.19                                                                        | 0.14                  |
| <b>DAP-B2</b>                   | 29.12 ± 1.92                                             | 0.244                             | 0.975 ± 0.52                                                                        | 0.25                  |

<sup>a</sup>Average values and standard deviation (SD) were calculated from minimum n=3 independent trials.

<sup>b</sup>Significance value was calculated using one-tailed Student's *t* test. \*, *P* < 0.05. *E. faecium* 410, *E. faecium* 1,231,410.
